# Supplementary material
Source: PubMed Central journal article supplement (PMC4497741)
Supplement: JCI75438sd.pdf [file JCI75438sd.pdf]

## Supplemental Figure 1

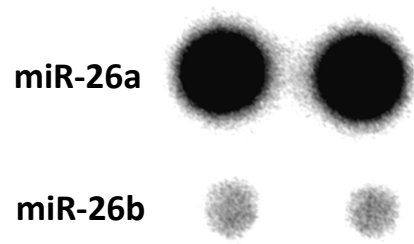

**Supplemental Figure 1. Expression of miR-26a is higher than miR-26b in the mouse liver.** Dot blot analysis of miR-26a/b expression in the livers of wild-type mice fed a chow diet (CD).

# Supplemental Figure 2

## Gene ontology analysis

| Term                                      | Count | p value  |
|-------------------------------------------|-------|----------|
| cellular metabolic process                | 92    | 2.62E-04 |
| cellular process                          | 128   | 6.83E-04 |
| primary metabolic process                 | 92    | 0.001488 |
| cellular macromolecule metabolic process  | 73    | 0.002241 |
| negative regulation of cell proliferation | 11    | 0.004752 |
| gene silencing by RNA                     | 4     | 0.004894 |
| DNA metabolic process                     | 13    | 0.006998 |
| protein localization                      | 18    | 0.010977 |
| negative regulation of biological process | 30    | 0.012601 |
| metabolic process                         | 95    | 0.013085 |

**Supplemental Figure 2. Potential involvement of miR-26a in metabolism.** KEGG pathway analysis on Top 500 targets of miR-26a predicted by TargetScan.

## Supplemental Figure 3

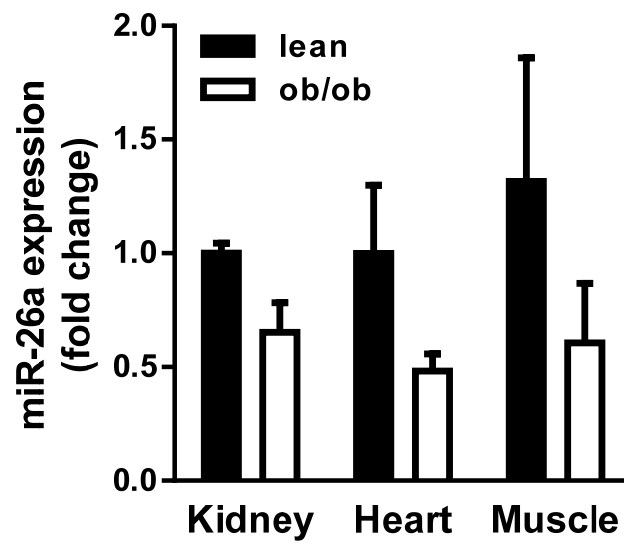

**Supplemental Figure 3. miR-26a is slightly reduced in obesity-associated organs of ob/ob mice.**

QRT-PCR analysis of miR-26a expression in kidney, heart and muscle of ob/ob mice. Data are shown as mean  $\pm$  SEM.

## Supplemental Figure 4

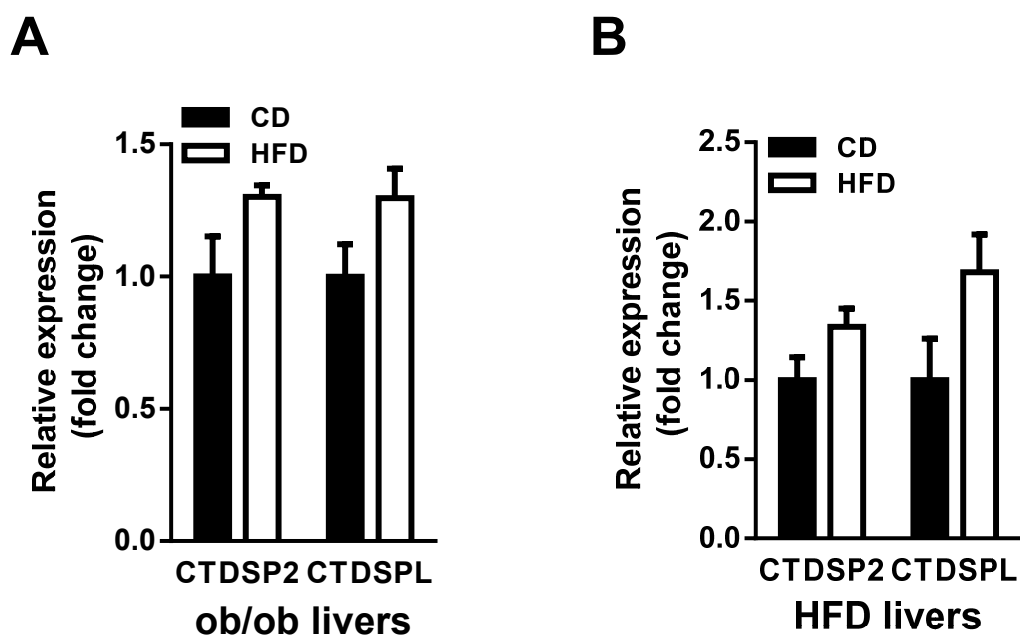

**Supplemental Figure 4.** Expression of miR-26a host genes, CTDSP2 and CTDSPL, is not affected by obesity. (**A** and **B**) QRT-PCR analysis of miR-26a expression in the livers of ob/ob (**A**) and high fat diet (HFD)-induced obese mice (**B**). Data are shown as mean  $\pm$  SEM.

# Supplemental Figure 5

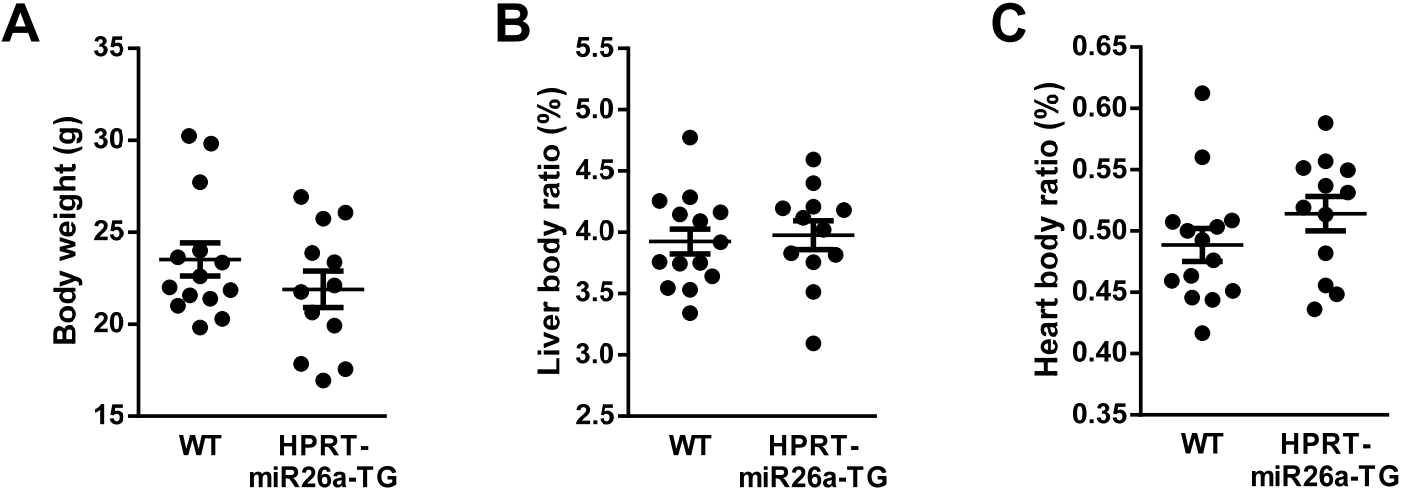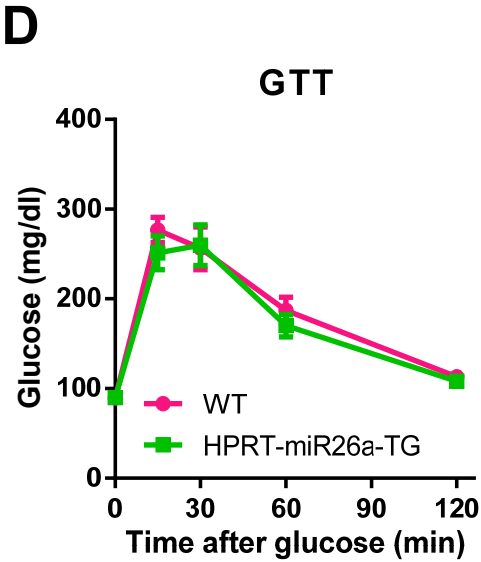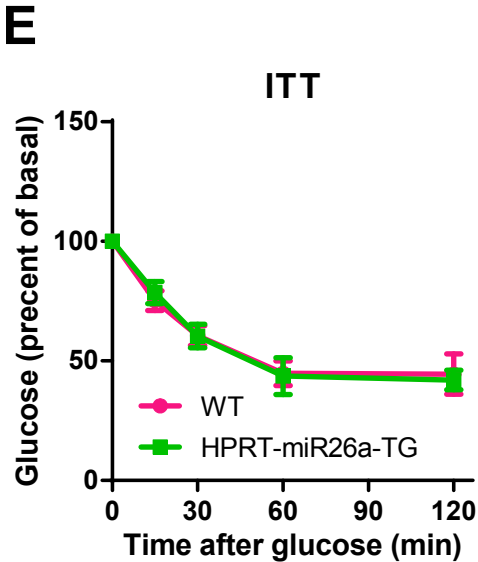

**Supplemental Figure 5.** HPRT-miR-26a TG and WT mice fed a CD have no significant differences in body weight (BW), organ weight, glucose disposal or insulin sensitivity. (A-E) Adult (8-12 weeks old) male HPRT-miR26a-TG mice and their WT littermate controls fed a chow diet were studied. Body weight (A), ratio of liver (B) and heart (C) to body weight were measured (HPRT-miR26a-TG, n=12; WT, n=14). (D) GTT (HPRT-miR26a-TG, n=7; WT, n=7). (E) ITT (HPRT-miR-26a-TG, n=7; WT, n=7). Data are shown as mean  $\pm$  SEM.

## Supplemental Figure 6

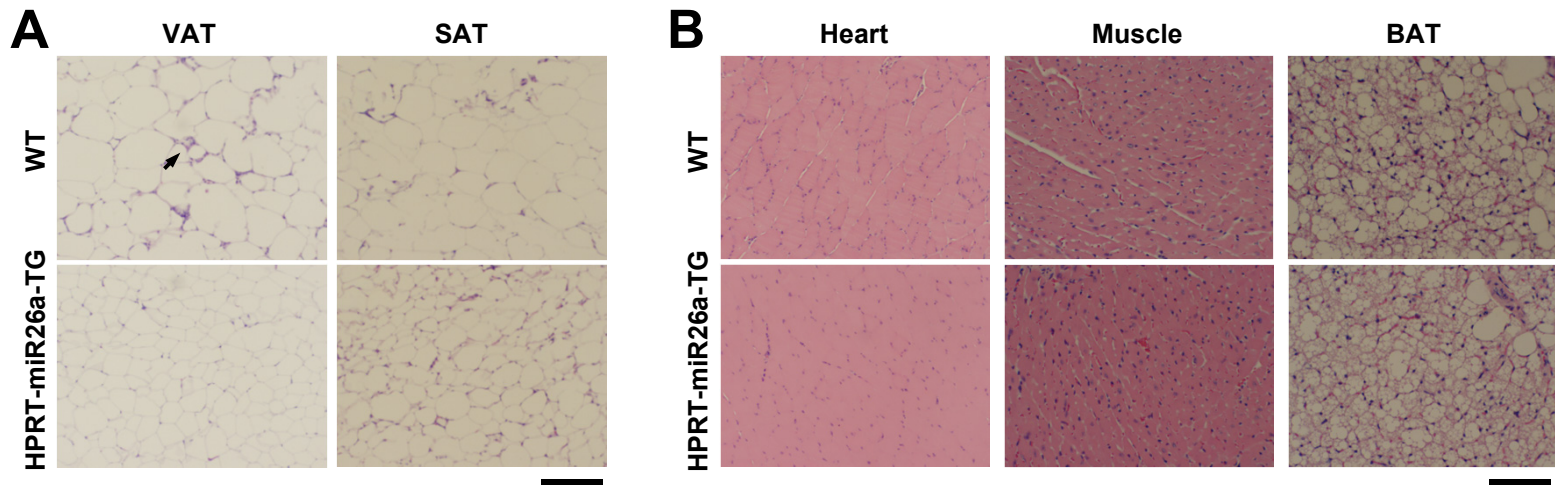

**Supplemental Figure 6.** Hematoxylin staining of paraffin sections from visceral (VAT) and subcutaneous (SAT) fat (A), heart, muscle and brown adipose tissue (BAT) (B) of HPRT-miR26a-TG and WT mice fed an HFD for 18 weeks. Scale bar, 100  $\mu$ M.

## Supplemental Figure 7

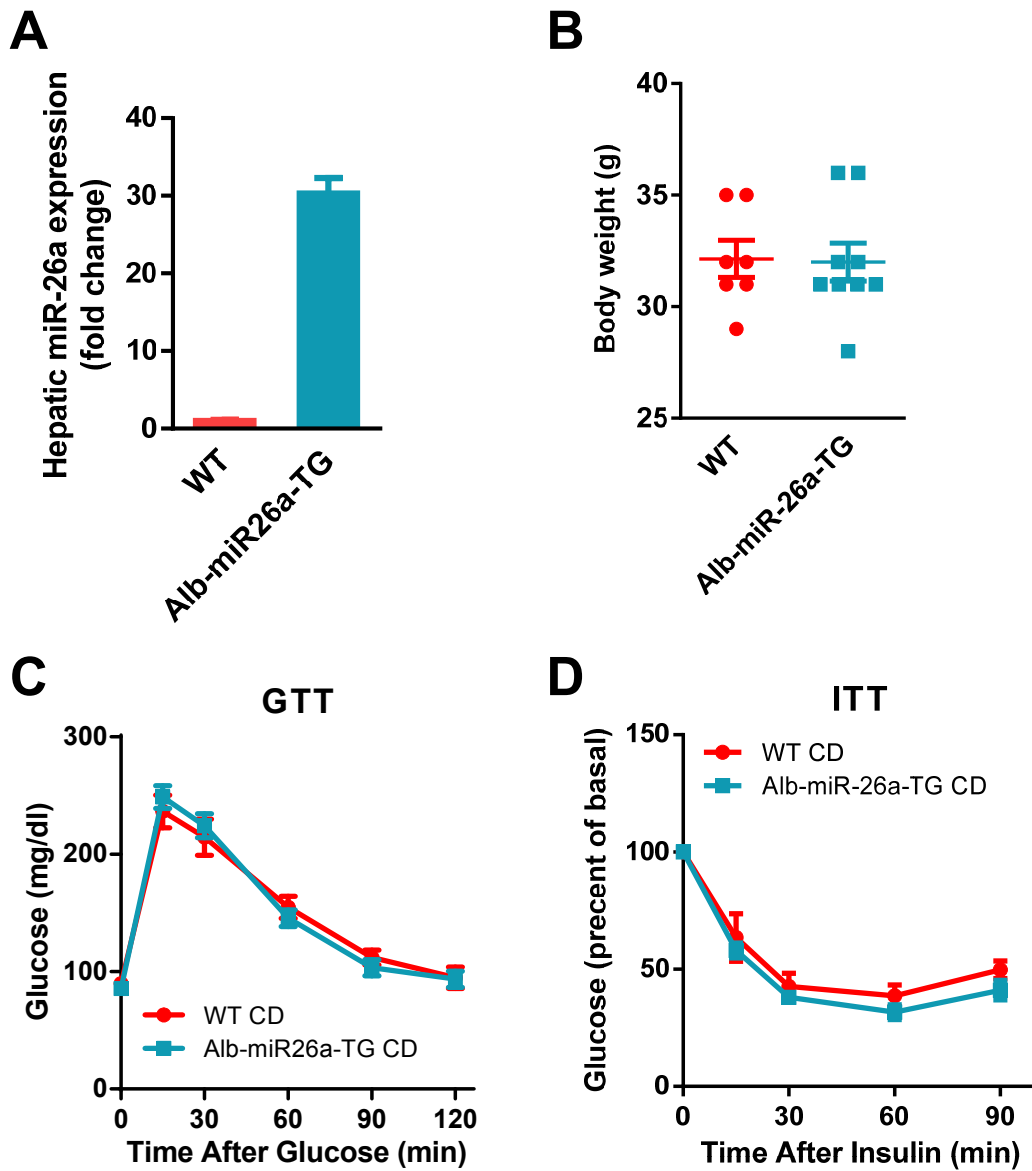

**Supplemental Figure 7.** Alb-miR-26a TG and WT mice fed a CD have no significant differences in glucose disposal or insulin sensitivity. **(A)** QRT-PCR analysis of miR-26a expression in liver of Alb-miR-26a TG and their WT littermate controls (n=6). **(B-D)** Adult (8-12 weeks old) male Alb-miR26a-TG mice and their WT littermate controls fed a chow diet were studied. **(B)** Body weight (Alb-miR26a-TG, n=9; WT, n=7), **(C)** GTT (Alb-miR26a-TG, n=4; WT, n=4), and **(D)** ITT (Alb-miR26a-TG, n=9; WT, n=6) were measured. Data are shown as mean  $\pm$  SEM.

# Supplemental Figure 8

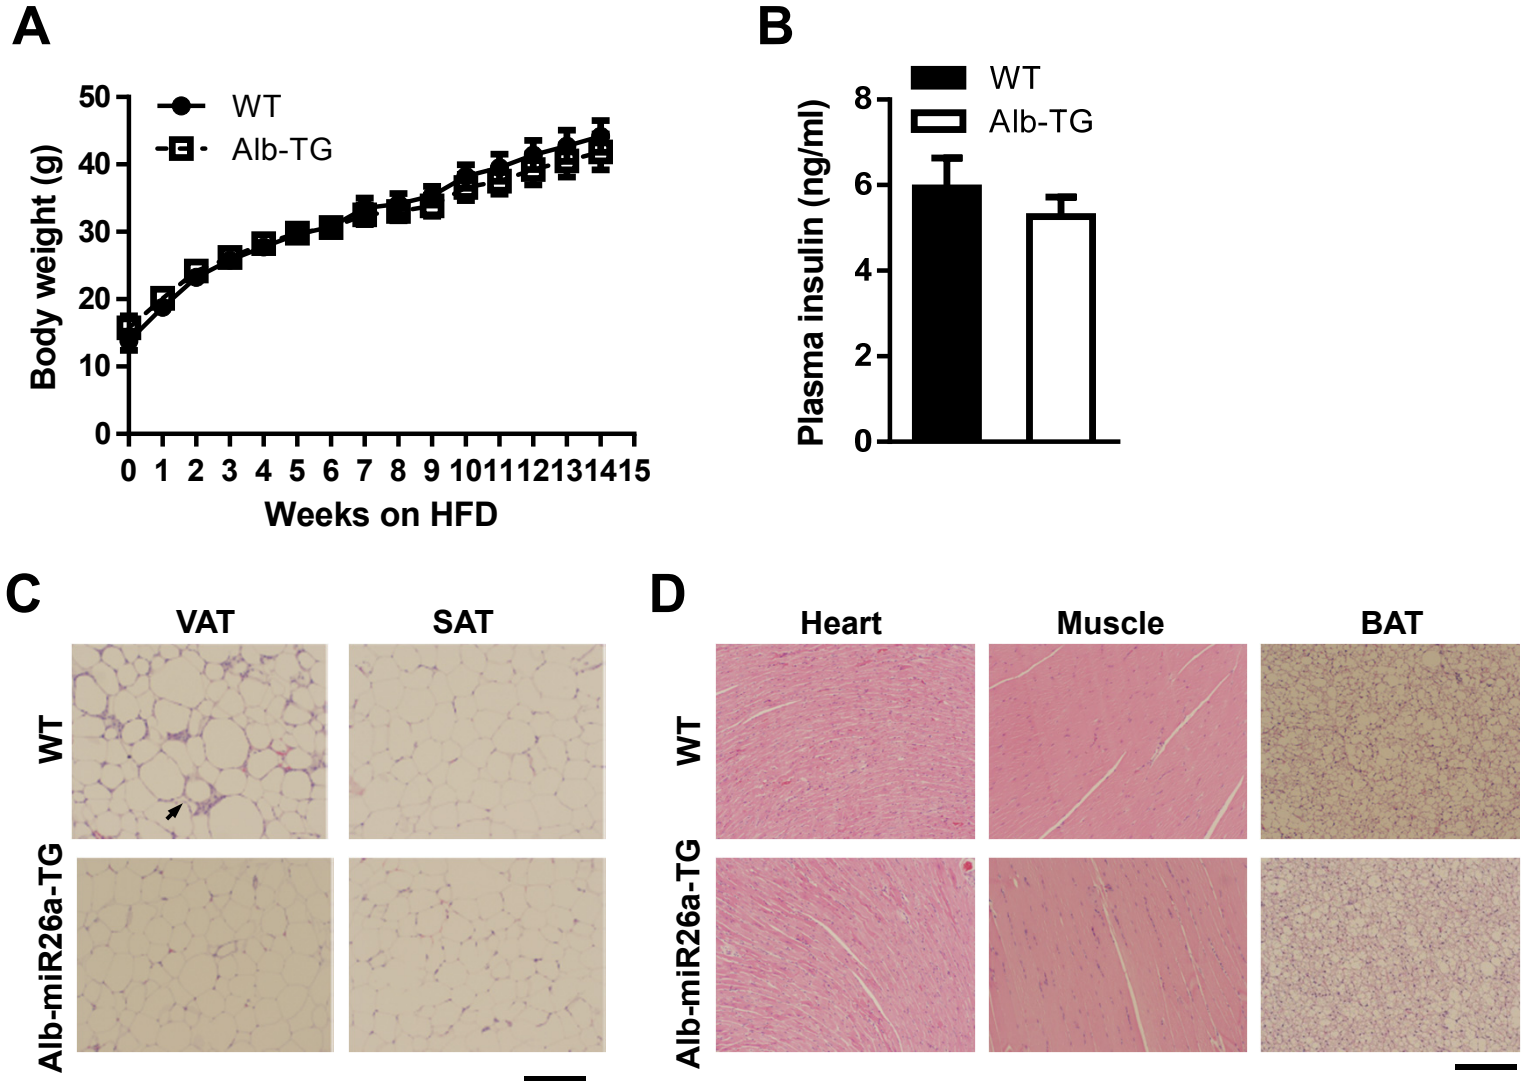

**Supplemental Figure 8.** Alb-miR-26a-TG and WT mice were fed HFD beginning at 6-8 weeks-of-age. The following measurements were performed during the course of the HFD. **(A)** Body weight (n=15-17). **(B)** Plasma insulin levels during GTT (30 minutes after glucose injection) (n=3). **(C and D)** Hematoxylin staining of paraffin sections from visceral (VAT) and subcutaneous (SAT) fat **(C)**, heart, muscle and brown adipose tissue (BAT) **(D)** of Alb-miR-26a-TG and WT mice fed an HFD for 16 weeks. Scale bar, 100  $\mu$ M.



## Supplemental Figure 9

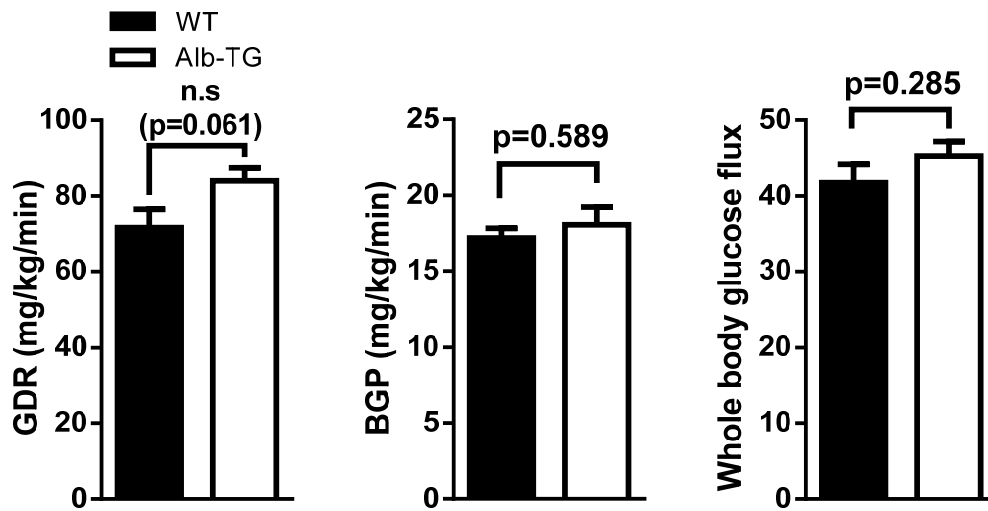

**Supplemental Figure 9.** Hyperinsulinemic-euglycemic clamp studies on Alb-miR-26a TG mice and WT controls after 18 weeks of HFD (n=4-6). GDR: glucose disposal rate; BGP: basal glucose production.

## Supplemental Figure 10

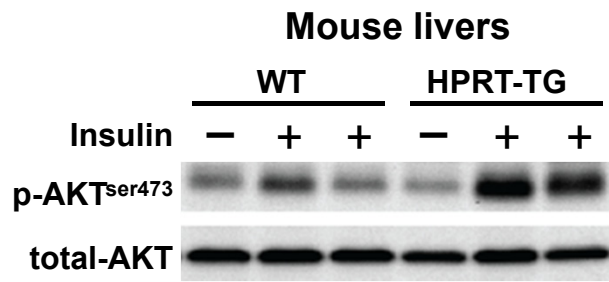

**Supplemental Figure 10.** AKT phosphorylation in livers of HPRT-miR-26a TG mice and WT littermate controls infused with insulin (0.25 U/kg) through the portal vein and fed an HFD for 18 weeks.

# Supplemental Figure 11

## Gene Ontology analysis

| Gene Ontology term                                  | Gene count | Fold enrichment | P Value  |
|-----------------------------------------------------|------------|-----------------|----------|
| oxidation reduction                                 | 79         | 5.938286        | 2.57E-39 |
| translation                                         | 34         | 5.383832        | 4.80E-15 |
| generation of precursor metabolites and energy      | 29         | 5.612557        | 2.58E-13 |
| fatty acid metabolic process                        | 21         | 5.765072        | 6.05E-10 |
| glucose metabolic process                           | 17         | 6.133723        | 1.61E-08 |
| hexose metabolic process                            | 18         | 5.380084        | 3.90E-08 |
| monosaccharide metabolic process                    | 19         | 5.024855        | 4.26E-08 |
| carboxylic acid catabolic process                   | 13         | 8.107026        | 5.72E-08 |
| organic acid catabolic process                      | 13         | 8.107026        | 5.72E-08 |
| energy derivation by oxidation of organic compounds | 14         | 7.216144        | 6.17E-08 |
| cofactor metabolic process                          | 17         | 4.718248        | 6.31E-07 |
| coenzyme metabolic process                          | 14         | 4.94533         | 4.99E-06 |

**Supplemental Figure 11.** Gene ontology analysis of differentially expressed hepatic proteins between WT and Alb-miR-26a TG mice.

## Supplemental Figure 12

### KEGG pathway analysis

---

| Term                                         | Count     | P Value         |
|----------------------------------------------|-----------|-----------------|
| <b>Fatty acid metabolism</b>                 | <b>14</b> | <b>2.32E-11</b> |
| Ribosome                                     | 17        | 2.58E-10        |
| PPAR signaling pathway                       | 13        | 3.51E-07        |
| Valine, leucine and isoleucine degradation   | 10        | 1.21E-06        |
| Drug metabolism                              | 12        | 1.59E-06        |
| Metabolism of xenobiotics by cytochrome P450 | 10        | 2.69E-05        |
| Propanoate metabolism                        | 7         | 6.94E-05        |
| <b>Glycolysis / Gluconeogenesis</b>          | <b>9</b>  | <b>2.21E-04</b> |
| Starch and sucrose metabolism                | 6         | 0.00165         |
| Tryptophan metabolism                        | 6         | 0.002664        |

---

**Supplemental Figure 12.** KEGG pathway analysis on hepatic proteins downregulated in Alb-miR-26a TG mice.

# Supplemental Figure 13

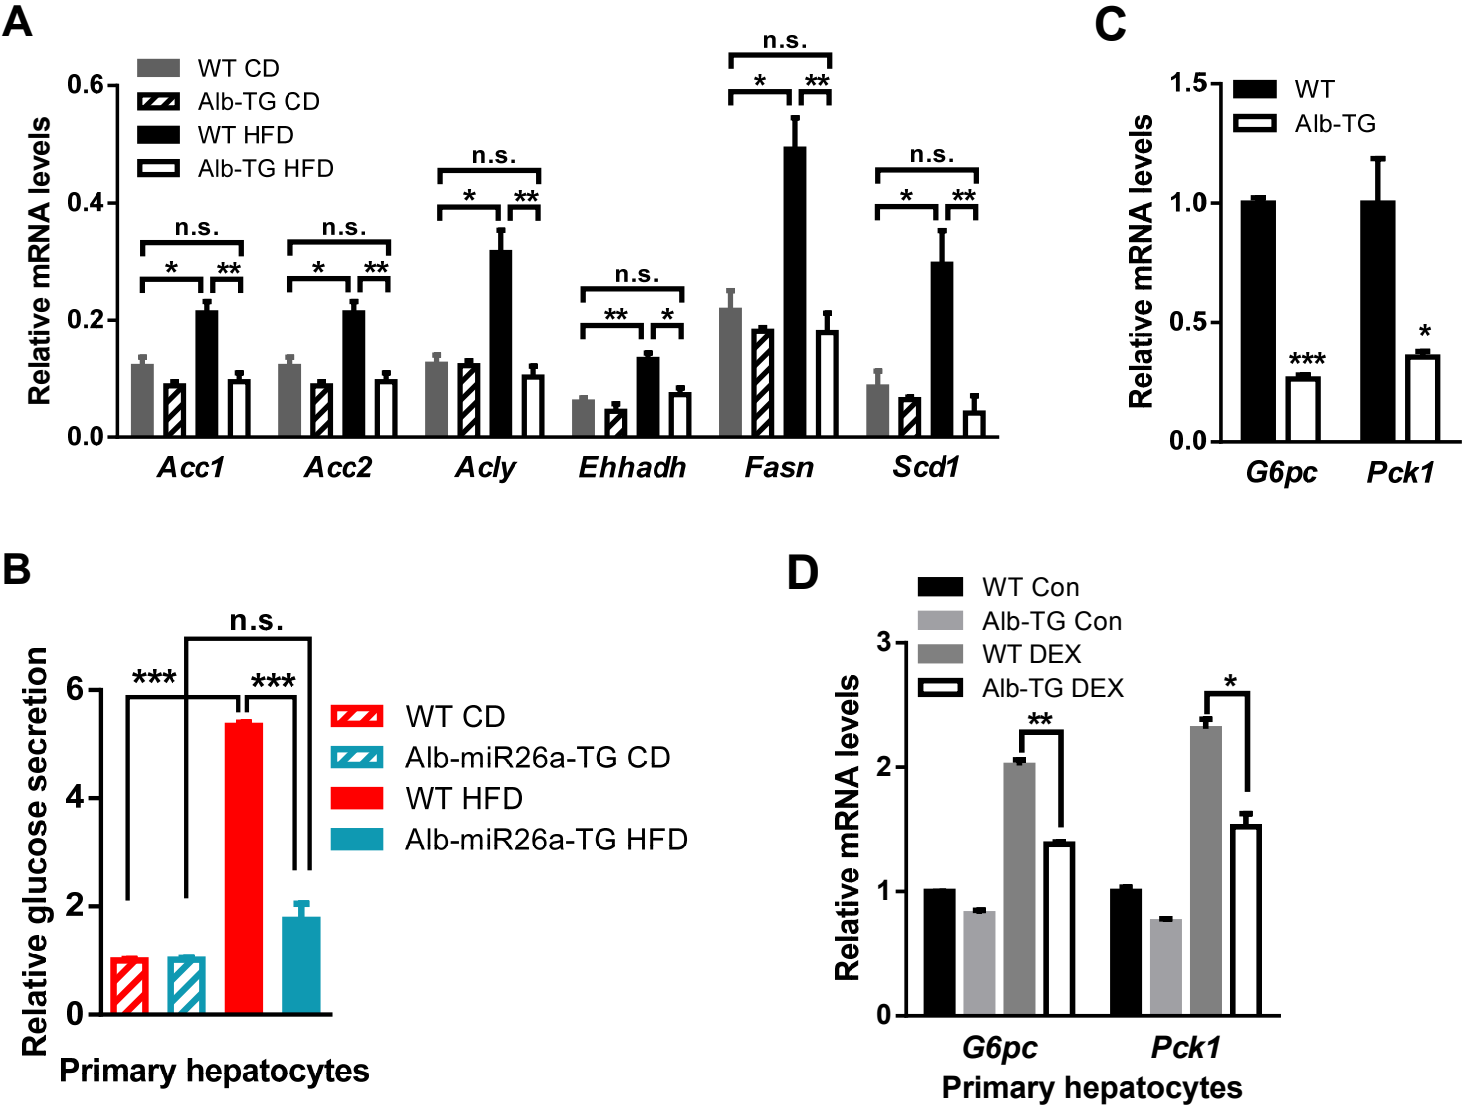

**Supplemental Figure 13.** (A) QRT-PCR analysis of selected lipogenic genes in livers from mice either fed a CD or HFD for 16 weeks (n=3-5 mice/group). (B) Glucose production (4 hours) in primary hepatocytes isolated from Alb-miR-26a TG and WT mice fed either a CD or an HFD for 16 weeks. Results are normalized to the level in hepatocytes isolated from WT mice fed a CD (n=3). (C) Expression of gluconeogenic genes in livers of 16 hours fasted Alb-miR-26a TG and WT mice fed a CD (n=3). (D) Expression of gluconeogenic genes in DEX-treated primary hepatocytes isolated from Alb-miR-26a TG and WT mice fed a CD (n=3). Data are shown as mean  $\pm$  SEM. n.s., not significant.

## Supplemental Figure 14

| <b>No. of miR-26a target sites</b> |            |            |
|------------------------------------|------------|------------|
|                                    | <b>Hsa</b> | <b>Mmu</b> |
| <b>AcsI3</b>                       | 1          | 2          |
| <b>AcsI4</b>                       | 2          | 2          |
| <b>GSK3<math>\beta</math></b>      | 3          | 3          |
| <b>Pck1</b>                        | 1          | 1          |
| <b>Pkc<math>\delta</math></b>      | 1          | 1          |
| <b>Pkc<math>\theta</math></b>      | 1          | 2          |
| <b>Tcf7I2</b>                      | 1          | 1          |

**Supplemental Figure 14.** Number of predicted miR-26a target sites for indicated genes.

# Supplemental Figure 15

**A****Acsl3 (NM\_001033606) (3'UTR length: 1328 bp)**

Binding site 1 (50-57)

```
Acsl3 UTR 5' GAUCAAAUAGGAAAAUACUUGAA 3'
           |  ||   ||  |||||
miR-26a  3'  UGGAUAGGACUAAUGAACUU 5'
```

Binding site 2 (1243-1249)

```
Acsl3 UTR 5' AUACUAACAAUUGUGACUUGAAA 3'
           ||| |   |  |||||
miR-26a  3'  UCGGAUAGGACCUGAACUU 5'
```

**B****Acsl4 (NM\_001033600) (3'UTR length: 2684 bp)**

Binding site 1 (1213-1219)

```
Acsl4 UTR 5' GGAGAAGGGCAGAGUUACUUGAU 3'
           |  |  |||||
miR-26a  3'  UCGGAUAGGACCUGAACUU 5'
```

Binding site 2(2646-2652)

```
Acsl4 UTR 5' UAUUUUUUAGUUUGCACUUGAAU 3'
           |  |   |||||
miR-26a  3'  UCGGAUAGGACCUGAACUU 5'
```

**C****Gsk3β (NM\_019827) (3'UTR length: 5510 bp)**

Binding site 1 (41-47)

```
Gsk3β UTR 5' GGAAAGACCAGCACUUACUUGAG 3'
           |   || |  |||||
miR-26a  3'  UCGGAUAGGACCUGAACUU 5'
```

Binding site 2 (1635-1641)

```
Gsk3β UTR 5' GUGCUIAUGGGCCAUUACUUGAC 3'
           ||  ||   ||  |||||
miR-26a  3'  UCGGAUAGGACCUGAACUU 5'
```

Binding site 3 (4701-4708)

```
Gsk3β UTR 5' GCUGUGUAACAUUACUACUUGAA 3'
           |   |  |||||
miR-26a  3'  UCGGAUAGGACCUGAACUU 5'
```

**D****Pck1 (NM\_011044) (3'UTR length: 607 bp)**

Binding site (312-318)

```
PCK1 UTR 5' AAUGCACAGAAAACAUACUUGAG 3'
           |  |   |||||
miR-26a  3'  UCGGAUAGGACCUGAACUU 5'
```

**E****Pkcδ (NM\_011103) (3'UTR length: 513 bp)**

Binding site (232-239)

```
Pkcδ UTR 5' AAUCCUGUGUUUCAUUACUUGAA 3'
           ||||| |  |||||
miR-26a  3'  UCGGAUAGGACCUGAACUU 5'
```

**F****Pkcθ (NM\_008859) (3'UTR length: 1101 bp)**

Binding site 1 (278-285)

```
Pkcθ UTR 5' UUAACUCUAGUCAUUUACUUGAA 3'
           || | |  |||||
miR-26a  3'  UCGGAUAGGACCUGAACUU 5'
```

Binding site 2 (567-573)

```
Pkcθ UTR 5' UAAACAUAGCAUGAAACUUGAAA 3'
           ||   |||||
miR-26a  3'  UCGGAUAGGACCUGAACUU
```

**G****Tcf7l2 (NM\_001142918) (3'UTR length: 2240 bp)**

Binding site (1459-1465)

```
Tcf7l2 UTR 5' AUUCUGUAAAACAAGACUUGAAC 3'
           || |   |  |||||
miR-26a  3'  UGGAUAGGACUAAUGAACUU 5'
```

**Supplemental Figure 15.** miR-26a targets murine Acsl3, Acsl4, Gsk3β, Pck1, Pkcδ, Pkcθ and Tcf7l2.

Predicted consequential pairing of target region, as well as its mutant, and miR-26a is shown (bottom).

# Supplemental Figure 16

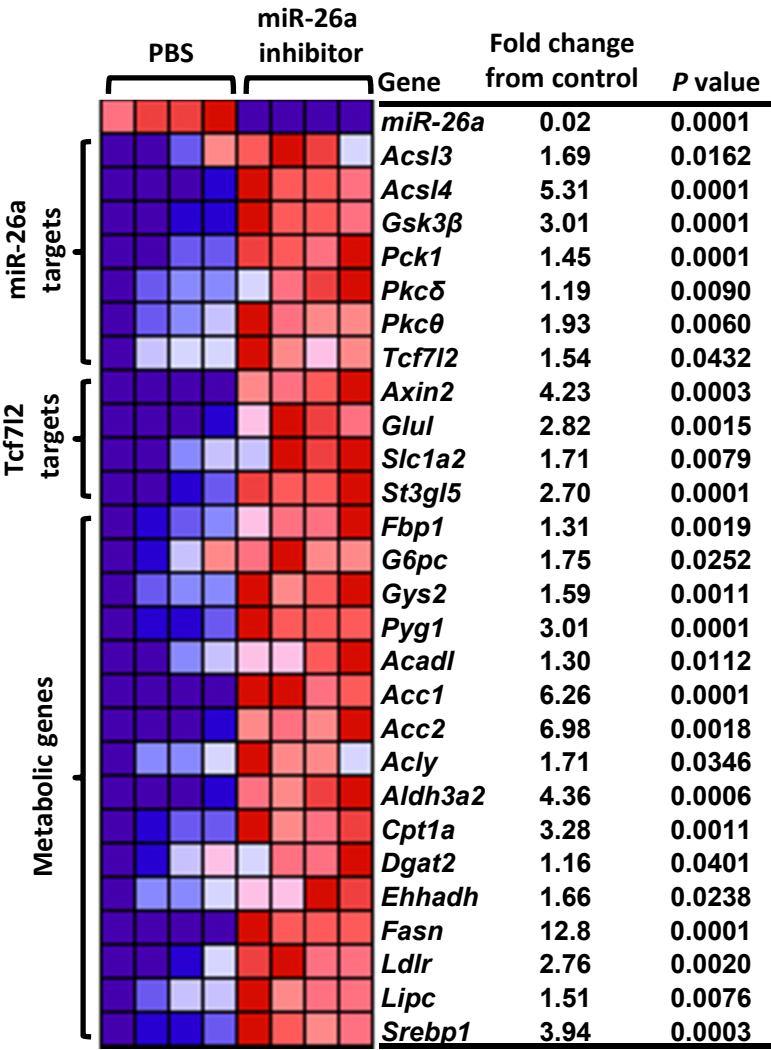

**Supplemental Figure 16.** Heatmap of mRNA levels of hepatic genes in CD-fed WT mice that received a single injection of LNA-miR-26a antisense inhibitor or PBS (n=4). Red and blue depict higher and lower gene expression, respectively. Color intensity indicates magnitude of expression differences.



# Supplemental Table 2

## Gene Ontology analysis (related to Figure 4B)

| Term                                                | Genes                                                                                                                                                                                                                                                                                                                                                                                                                                                                                                                                                                                            |
|-----------------------------------------------------|--------------------------------------------------------------------------------------------------------------------------------------------------------------------------------------------------------------------------------------------------------------------------------------------------------------------------------------------------------------------------------------------------------------------------------------------------------------------------------------------------------------------------------------------------------------------------------------------------|
| oxidation reduction                                 | CYP2D9, CYP2J5, CYB5R3, CYP2D10, ACOX1, ASPDH, UQCRC1, EHHADH, PRDX5, PRDX2, PRDX3, UQCRFS1, PRDX1, AKR1C13, MTHFD1, PECR, UQCR10, CPOX, NDUFS8, SPR, DHTKD1, NDUFS2, RTN4IP1, NQO2, SUOX, CYP2C54, ACADM, CYP1A1, CYCS, CYP2C29, QDPR, CYB5B, GRHPR, ACADL, POR, DHRS1, DHRS4, CYP27A1, ALDH1B1, UQCRH, SQLE, DLD, HSD11B1, MECR, HSD17B11, ME1, ME3, ACADSB, HSD17B13, HSD17B12, UGDH, ADH5, AASS, FTH1, ALDH3A2, CYP4A12A, FMO1, FASN, IDH2, DMGDH, HSD17B4, BCKDHA, GPD2, NDUFA4, GCDH, CYP2C37, PTGR2, NDUFA9, MAOB, BCKDHB, HGD, CRYZ, SOD1, SLC25A12, CYP7B1, DBT, BLVRB, ACAD11, CYP4A14 |
| translation                                         | TUFM, RPL17, RPL14, RPLP2, RPS2, RPL7, RPS3A, RPLP0, RPL9, RPL3, RPL10, RPL10A, RPL4, RPS20, RPL12, RPS27A, RPS24, EEF1A1, AARS, RPL27, RPL24, RPS4X, EIF4G2, TARS, RPS18, RPL18A, RPL22, RPS17, RPS14, EIF4A2, RPL21, EIF4A1, RPS13, EEF1G                                                                                                                                                                                                                                                                                                                                                      |
| generation of precursor metabolites and energy      | ALDOA, UQCRC1, ALDOB, PGAM1, AASS, UQCRFS1, TPI1, UQCR10, NDUFS8, IDH2, ENO3, GYS2, DHTKD1, NDUFS2, ENO1, NDUFA4, DLST, NDUFA9, SUCLG1, CYCS, CYB5B, PPP1CB, PCK1, SLC25A12, GBE1, PYGL, UQCRH, DLD, PYGB                                                                                                                                                                                                                                                                                                                                                                                        |
| fatty acid metabolic process                        | ACOX1, ACADSB, ECH1, ACADM, CPT2, EHHADH, ECHDC2, LYPLA2, LYPLA1, ACADL, CPT1A, PECR, TPI1, CYP4A12A, FAAH, FASN, HSD17B4, ACAA1B, MECR, SLC27A2, CROT                                                                                                                                                                                                                                                                                                                                                                                                                                           |
| glucose metabolic process                           | ALDOA, GPD2, ALDOB, PGAM1, FBP1, PPP1CB, CPT1A, PCK1, PGLS, TPI1, GBE1, PYGL, ENO3, GYS2, DHTKD1, PYGB, ENO1                                                                                                                                                                                                                                                                                                                                                                                                                                                                                     |
| hexose metabolic process                            | ALDOA, GPD2, ALDOB, PGAM1, FBP1, PPP1CB, CPT1A, PCK1, GALK1, PGLS, TPI1, GBE1, PYGL, ENO3, GYS2, DHTKD1, PYGB, ENO1                                                                                                                                                                                                                                                                                                                                                                                                                                                                              |
| monosaccharide metabolic process                    | GPD2, ALDOA, ALDOB, PGAM1, FBP1, PPP1CB, CPT1A, PCK1, GALK1, PGLS, UGT1A9, TPI1, GBE1, PYGL, UGT1A2, ENO3, GYS2, DHTKD1, PYGB, ENO1                                                                                                                                                                                                                                                                                                                                                                                                                                                              |
| organic acid catabolic process                      | BCKDHA, ACOX1, ACADM, EHHADH, BCKDHB, HGD, AASS, MTHFD1, AMDHD1, FAAH, DMGDH, HSD17B4, SLC27A2                                                                                                                                                                                                                                                                                                                                                                                                                                                                                                   |
| carboxylic acid catabolic process                   | BCKDHA, ACOX1, ACADM, EHHADH, BCKDHB, HGD, AASS, MTHFD1, AMDHD1, FAAH, DMGDH, HSD17B4, SLC27A2                                                                                                                                                                                                                                                                                                                                                                                                                                                                                                   |
| energy derivation by oxidation of organic compounds | DLST, UQCRC1, SUCLG1, PPP1CB, PCK1, SLC25A12, UQCR10, GBE1, UQCRH, PYGL, DLD, IDH2, GYS2, PYGB                                                                                                                                                                                                                                                                                                                                                                                                                                                                                                   |
| cofactor metabolic process                          | ASPDH, DLST, COASY, ALAD, EHHADH, SUCLG1, GSTT1, SOD1, MTHFD1, DBT, PGLS, TPI1, HPX, CPOX, GSTK1, IDH2, QPRT                                                                                                                                                                                                                                                                                                                                                                                                                                                                                     |
| coenzyme metabolic process                          | DLST, COASY, ASPDH, EHHADH, SUCLG1, GSTT1, SOD1, MTHFD1, DBT, PGLS, TPI1, GSTK1, IDH2, QPRT                                                                                                                                                                                                                                                                                                                                                                                                                                                                                                      |
